# Supplementary material for: Reactivity of Zn+aq in high-temperature water radiolysis
Source: Royal Society of Chemistry journal article supplement (doi:10.1039/d2cp02434a), 2022-01-01
Supplement: d2cp02434a1.pdf [file d2cp02434a1.pdf]

## Supporting Information for publication:

### Reactivity of $\text{Zn}^+_{\text{aq}}$ in high-temperature water radiolysis

Aliaksandra Lisouskaya\*, Uddhav S. Markad, Ian Carmichael, and David M. Bartels

*Radiation Laboratory, University of Notre Dame, Notre Dame, Indiana 46556*

\*Corresponding Author: [alisousk@nd.edu](mailto:alisousk@nd.edu); phone (574) 631-5457

#### Contents:

- ✓ Decay kinetics of  $\text{Zn}^+$  observed in irradiated  $\text{ZnCl}_2$  and  $\text{Zn}(\text{ClO}_4)_2$  solutions (Figure S1)
- ✓ Transient absorption spectra observed in irradiated  $\text{Zn}(\text{ClO}_4)_2$  solutions vs. concentration (Figure S2)
- ✓ Transient absorption spectra and decay kinetics of  $\text{Zn}^+$  observed after pulse radiolysis in  $\text{ZnCl}_2$  and  $\text{Zn}(\text{ClO}_4)_2$  solutions at temperatures from 25°C to 300°C (Figure S3)
- ✓ Transient absorption spectra and decay kinetics observed after pulse radiolysis in  $\text{Zn}(\text{ClO}_4)_2$  solutions in water, methanol and isopropanol at room temperature (Figure S4)
- ✓ TD-DFT calculated absorption spectra of  $\text{Zn}^+_{\text{aq}}$  (Figure S5)
- ✓ Rate constants applied in the kinetics model for  $\text{Zn}^+_{\text{aq}}$  decay at temperatures up to 300°C (Table S1)
- ✓ Optimized Quantum Mechanical Geometries (Table S2)

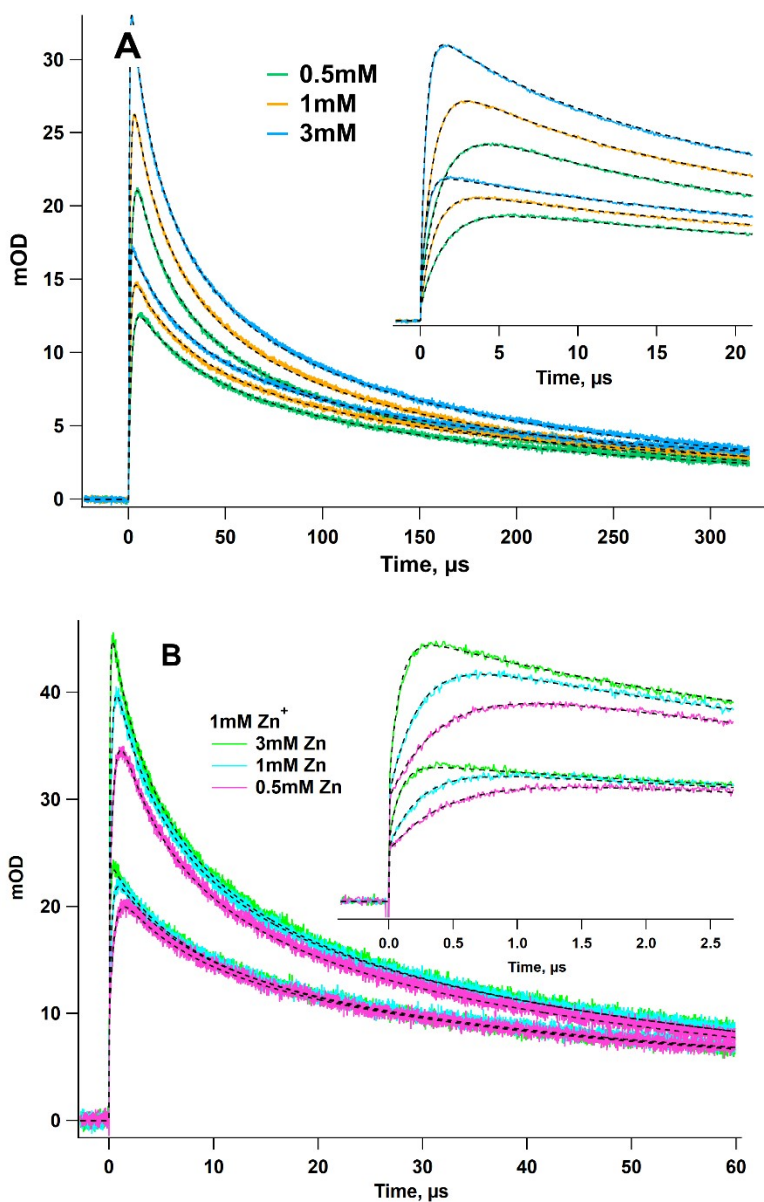

**Figure S1.** Decay kinetics of  $Zn^+$  at 311nm observed after 4ns- and 9-ns pulse radiolysis in Ar-saturated solutions **(A)**  $ZnCl_2$ , pH 5.6-6 and **(B)**  $Zn(ClO_4)_2$ , pH 3.5-4 (9.6 & 4.6 Gy) solutions at room temperature (9.6 & 4.6 Gy). When fitting the kinetic curves for  $Zn(ClO_4)_2$ , we took into account the pH of the medium.

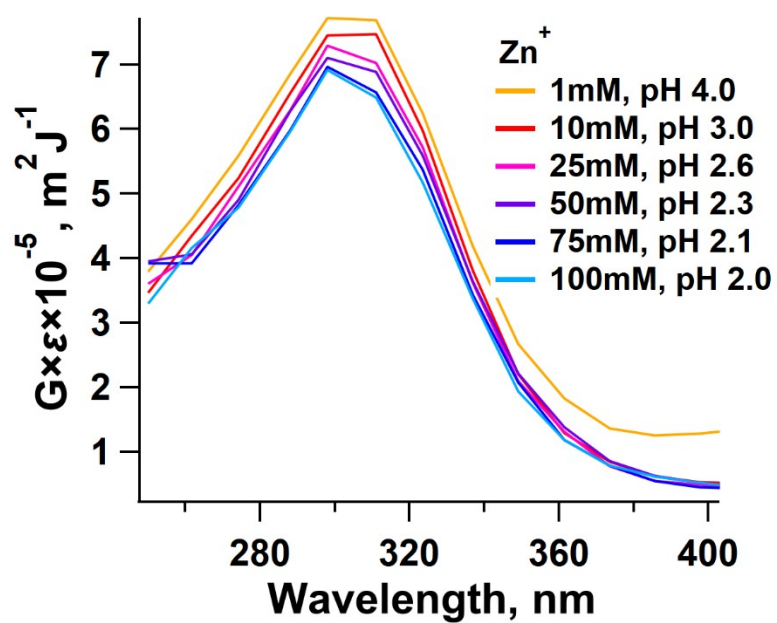

**Figure S2.** Transient absorption spectra observed 2  $\mu s$  after 15-ns pulse radiolysis in Ar-saturated solutions with 1-100 mM  $Zn(ClO_4)_2$  solutions at room temperature (15 Gy).

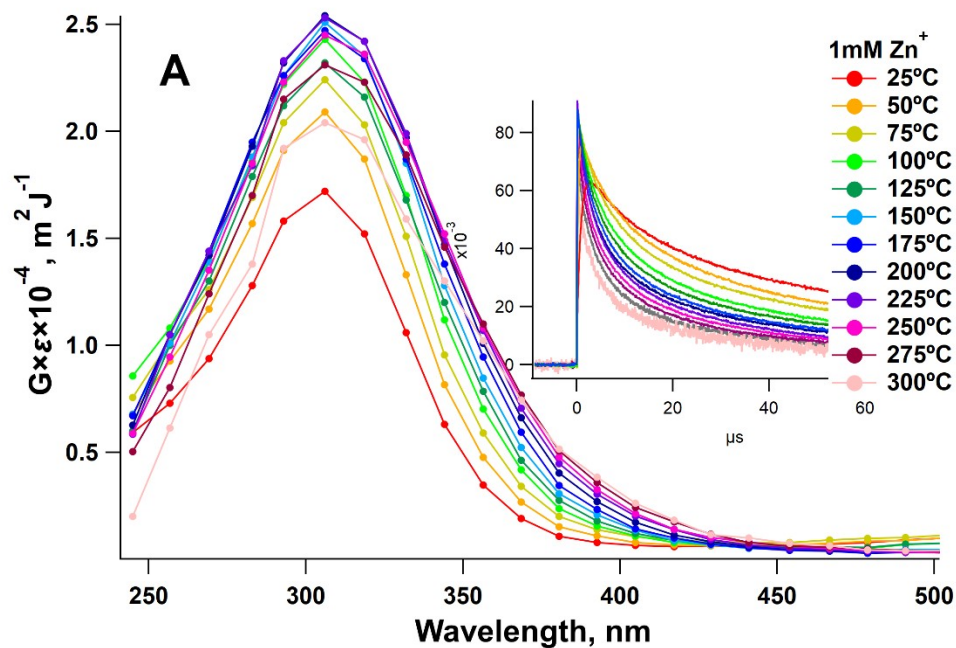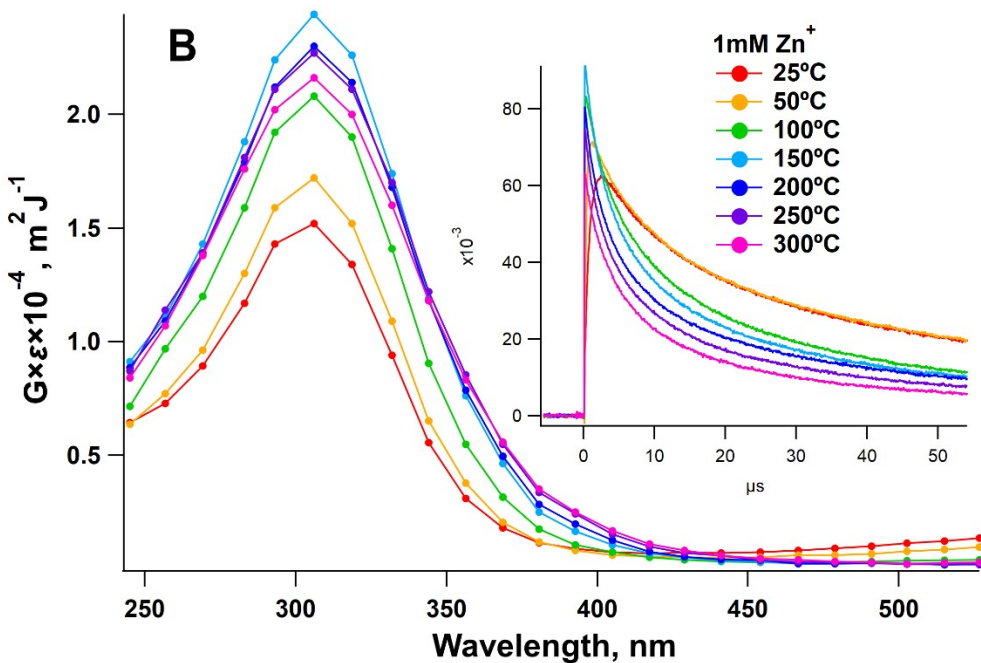

**Figure S3.** Transient absorption spectra and decay kinetics (insert) at 306 nm observed after 9-ns pulse radiolysis in Ar-saturated solutions with 1 mM  $\text{ZnCl}_2$  and  $\text{Zn}(\text{ClO}_4)_2$  at a temperature range from 25 to 300 °C (~14Gy).

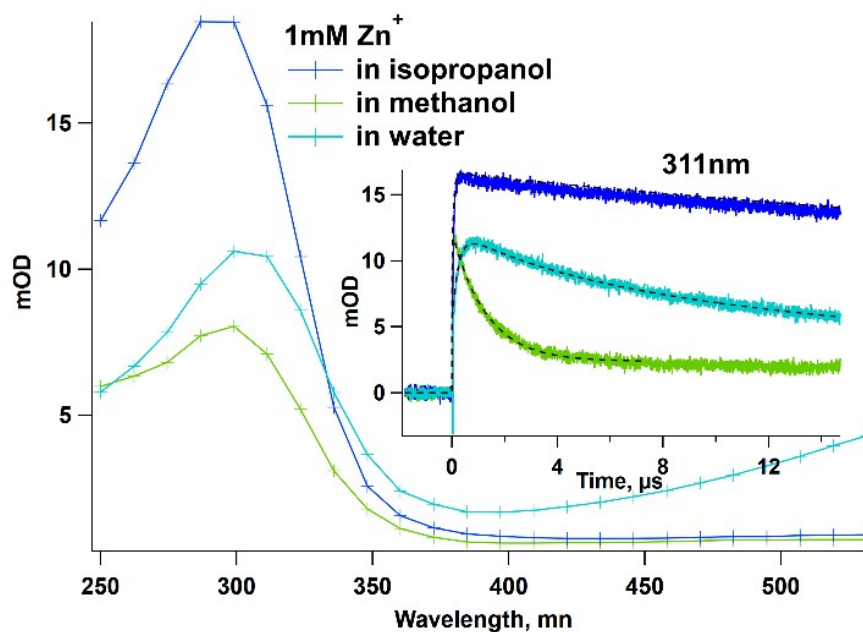

**Figure S4.** Transient absorption spectra and decay kinetics (insert) observed 2  $\mu\text{s}$  after 6-ns pulse radiolysis ( $\sim 14\text{Gy}$ ) in 1 mM  $\text{Zn}(\text{ClO}_4)_2$  solutions in water, methanol and isopropanol saturated with Ar at room temperature.

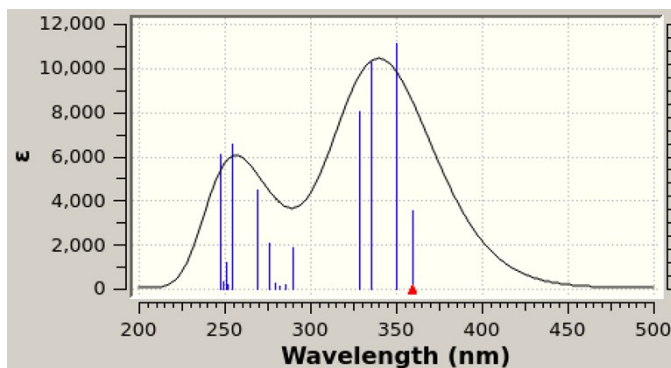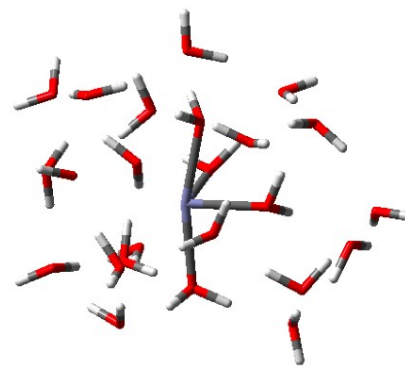

### Natural transition orbitals

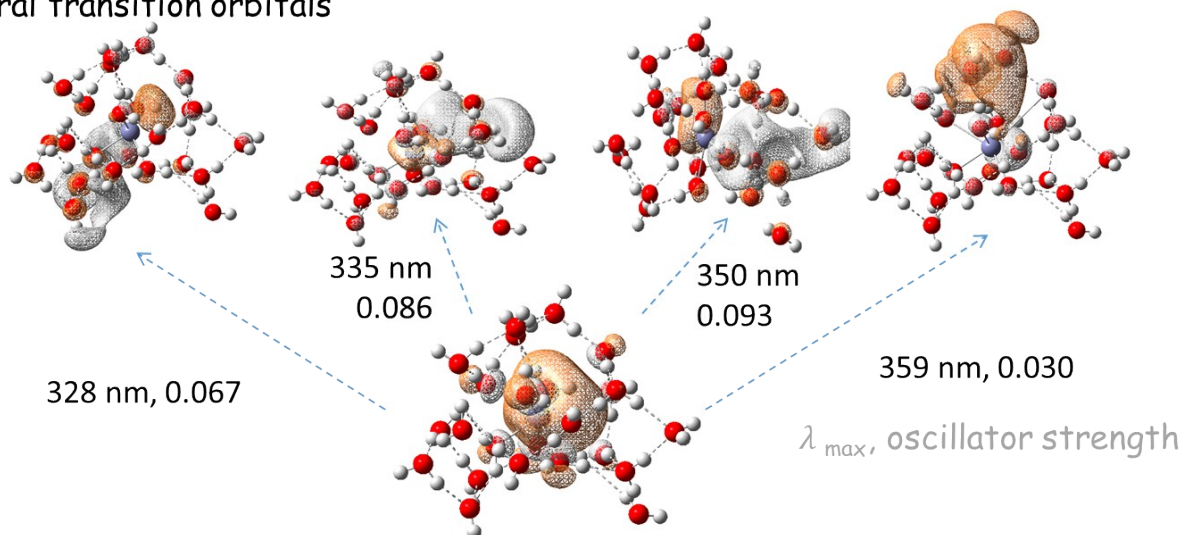

**Figure S5.** TD-DFT calculated absorption spectra of  $\text{Zn}^+$  coordinated by 24 water molecules. We used color code to show positive (gold) and negative (silver) lobes of the natural transitions of orbitals. The structures were optimized using the `iefpcm(SAS) $\omega$ b97xD/pc-1` procedure and the vertical excitation spectra were obtained with the same method but including diffuse function in the basis set (`apc-1`).

**Table S1. Rate constants ( $k \times 10^9 \pm 6\% \text{ M}^{-1}\text{s}^{-1}$ ) of the main reactions (1-4) applied in the kinetics model for  $\text{Zn}^+$  decay at temperatures up to  $300^\circ\text{C}$  in  $\text{ZnSO}_4$  and  $\text{ZnCl}_2$  solutions**

| № | 25°C | 50°C | 75°C | 100°C | 125°C | 150°C | 175°C | 200°C | 225°C | 250°C | 275°C | 300°C |
|---|------|------|------|-------|-------|-------|-------|-------|-------|-------|-------|-------|
| 1 | 1.3  | 4.6  | 14.4 | 27.7  | 83.9  | 149   | 289   | 328   | 438   | 425   | 488   | 361   |
| 2 | 11.8 | 15.5 | 20.1 | 25.3  | 29.4  | 30.6  | 34.4  | 36.3  | 36.8  | 38.4  | 39.0  | 42.0  |
| 3 | 2.10 | 2.71 | 34.4 | 4.42  | 5.72  | 5.85  | 6.15  | 7.22  | 7.8   | 8.28  | 8.31  | 8.41  |
| 4 | 1.40 | 2.71 | 3.50 | 4.42  | 5.71  | 5.80  | 6.21  | 7.17± | 7.32  | 8.24  | 8.30  | 8.46  |

\*The given values are corrected for ionic strengths. When fitting the data obtained, the dose distribution in a 2.5 cm cell was taken into account.

**Table S2. Optimized Quantum Mechanical Geometries of Zn<sup>+</sup> transients**

|                                                       |           |           |           |                                                                   |           |           |           |
|-------------------------------------------------------|-----------|-----------|-----------|-------------------------------------------------------------------|-----------|-----------|-----------|
| <b>Zn<sup>+</sup>(H<sub>2</sub>O)<sub>3</sub></b>     |           |           |           | <b>Zn<sup>+</sup>(H<sub>2</sub>O)<sub>2</sub>(OH<sup>-</sup>)</b> |           |           |           |
| Zn                                                    | 0.102072  | -0.033664 | 0.80147   | Zn                                                                | -1.039825 | -0.011728 | -0.129208 |
| O                                                     | 0.113345  | -1.58793  | -0.871252 | O                                                                 | 0.178767  | 1.378049  | 0.425981  |
| O                                                     | -1.623637 | 0.653736  | -0.601653 | O                                                                 | 0.527713  | -1.583277 | 0.369748  |
| O                                                     | 1.211002  | 1.028871  | -0.891351 | O                                                                 | 2.445592  | 0.251993  | -0.173161 |
| H                                                     | -0.769923 | -1.529794 | -1.248481 | H                                                                 | -0.092545 | 2.237261  | 0.102269  |
| H                                                     | 0.218274  | -2.493843 | -0.569533 | H                                                                 | 1.347342  | -1.088828 | 0.141038  |
| H                                                     | -1.252047 | 1.37654   | -1.116326 | H                                                                 | 0.477743  | -2.321383 | -0.241282 |
| H                                                     | -2.395261 | 1.008618  | -0.153789 | H                                                                 | 2.591665  | 0.316942  | -1.118035 |
| H                                                     | 1.95489   | 1.563325  | -0.602605 | H                                                                 | 1.653981  | 0.833743  | 0.0117    |
| H                                                     | 1.576229  | 0.327663  | -1.439308 |                                                                   |           |           |           |
| <b>Zn<sup>+</sup>(H<sub>2</sub>O)(OH)<sub>2</sub></b> |           |           |           | <b>Zn<sup>+</sup>(OH<sup>-</sup>)<sub>3</sub></b>                 |           |           |           |
| Zn                                                    | -0.684829 | -0.318138 | 0.283245  | Zn                                                                | 0.006961  | -0.004556 | 0.218693  |
| O                                                     | 0.867033  | -0.940498 | -0.732252 | O                                                                 | -1.359919 | -1.325364 | -0.345636 |
| O                                                     | -1.435269 | 1.240804  | -0.531337 | O                                                                 | -0.442952 | 1.844576  | -0.349072 |
| O                                                     | 2.69243   | 0.803492  | 0.138885  | O                                                                 | 1.825128  | -0.553065 | -0.349529 |
| H                                                     | 1.133936  | -1.794819 | -0.390071 | H                                                                 | -1.67581  | -1.63871  | 0.504094  |
| H                                                     | -2.14874  | 1.562186  | 0.020931  | H                                                                 | -0.564623 | 2.273208  | 0.500363  |
| H                                                     | 2.521515  | 0.806693  | 1.081196  | H                                                                 | 2.293633  | -0.565492 | 0.487241  |
| H                                                     | 2.044619  | 0.13969   | -0.21179  |                                                                   |           |           |           |
| <b>Zn<sup>+</sup>(H<sub>2</sub>O)<sub>24</sub></b>    |           |           |           |                                                                   |           |           |           |
| O                                                     | -0.081262 | -2.507724 | -1.439002 |                                                                   |           |           |           |
| H                                                     | 0.275791  | -2.468669 | -0.524059 |                                                                   |           |           |           |
| H                                                     | 0.396907  | -3.313133 | -1.766885 |                                                                   |           |           |           |
| O                                                     | 1.139606  | -3.379299 | 0.946358  |                                                                   |           |           |           |
| H                                                     | 1.874334  | -2.92383  | 1.403501  |                                                                   |           |           |           |
| H                                                     | 0.405615  | -3.407462 | 1.602500  |                                                                   |           |           |           |
| O                                                     | -3.19999  | -0.578551 | -2.945507 |                                                                   |           |           |           |
| H                                                     | -2.240898 | -0.297804 | -2.920155 |                                                                   |           |           |           |
| H                                                     | -3.204649 | -1.347132 | -2.318864 |                                                                   |           |           |           |
| O                                                     | -2.848935 | -2.720338 | -1.248008 |                                                                   |           |           |           |
| H                                                     | -1.861765 | -2.72624  | -1.298356 |                                                                   |           |           |           |
| H                                                     | -3.045107 | -2.536512 | -0.304184 |                                                                   |           |           |           |
| O                                                     | 2.71211   | 3.046698  | -1.931653 |                                                                   |           |           |           |
| H                                                     | 2.028537  | 2.635542  | -2.521429 |                                                                   |           |           |           |
| H                                                     | 2.228636  | 3.49255   | -1.203332 |                                                                   |           |           |           |
| O                                                     | -3.289027 | -2.324063 | 1.526988  |                                                                   |           |           |           |
| H                                                     | -3.484896 | -1.393433 | 1.834025  |                                                                   |           |           |           |
| H                                                     | -4.044434 | -2.860561 | 1.817241  |                                                                   |           |           |           |
| O                                                     | 0.945847  | 1.893601  | -3.683082 |                                                                   |           |           |           |
| H                                                     | 0.296536  | 2.569389  | -3.933107 |                                                                   |           |           |           |
| H                                                     | 0.385976  | 1.156623  | -3.284898 |                                                                   |           |           |           |
| O                                                     | -5.454438 | 1.105579  | 0.538868  |                                                                   |           |           |           |
| H                                                     | -6.040177 | 0.346574  | 0.389914  |                                                                   |           |           |           |
| H                                                     | -5.025549 | 1.267441  | 0.351418  |                                                                   |           |           |           |
| O                                                     | 1.559602  | -4.678856 | -1.555467 |                                                                   |           |           |           |
| H                                                     | 1.489978  | -4.51996  | -0.5906   |                                                                   |           |           |           |
| H                                                     | 2.372119  | -4.166369 | -1.799542 |                                                                   |           |           |           |
| O                                                     | -0.631271 | 0.110201  | -2.517472 |                                                                   |           |           |           |
| H                                                     | -0.251137 | -0.772938 | -2.323247 |                                                                   |           |           |           |
| O                                                     | -0.909239 | 3.554065  | 1.176989  |                                                                   |           |           |           |
| H                                                     | -1.089608 | 2.888688  | 0.451948  |                                                                   |           |           |           |
| H                                                     | -1.63359  | 4.20061   | 1.098301  |                                                                   |           |           |           |
| O                                                     | 0.273871  | -0.471745 | 2.693929  |                                                                   |           |           |           |
| H                                                     | -0.255686 | -1.302157 | 2.791879  |                                                                   |           |           |           |
| H                                                     | -0.299714 | 0.290729  | 2.997613  |                                                                   |           |           |           |
| O                                                     | -0.943683 | -2.913337 | 2.699797  |                                                                   |           |           |           |



|                                  |           |           |                                                 |
|----------------------------------|-----------|-----------|-------------------------------------------------|
| H                                | -1.086617 | -3.350093 | 3.554178                                        |
| H                                | -1.84559  | -2.791276 | 2.292516                                        |
| O                                | 4.427453  | 1.211787  | -1.012246                                       |
| H                                | 4.965529  | 1.005603  | -1.792712                                       |
| H                                | 3.773744  | 1.900452  | -1.336636                                       |
| O                                | 3.705668  | -3.028517 | -2.066155                                       |
| H                                | 3.415358  | -2.26111  | -1.508657                                       |
| H                                | 4.466886  | -3.391712 | -1.586894                                       |
| O                                | 1.623629  | 4.302702  | 0.357562                                        |
| H                                | 1.803089  | 5.249633  | 0.468267                                        |
| H                                | 0.684452  | 4.167514  | 0.639752                                        |
| O                                | 2.910618  | -0.923663 | -0.485489                                       |
| H                                | 3.530012  | -0.152581 | -0.66126                                        |
| H                                | 3.024482  | -1.162932 | 0.47129                                         |
| O                                | 2.372819  | 2.152705  | 1.931887                                        |
| H                                | 2.360715  | 3.023021  | 1.477031                                        |
| H                                | 1.84603   | 1.586685  | 1.329205                                        |
| O                                | 2.84932   | -1.448242 | 2.22299                                         |
| H                                | 2.021139  | -1.020246 | 2.539164                                        |
| H                                | 3.565711  | -0.809157 | 2.488295                                        |
| O                                | -3.734691 | 0.20881   | 2.347081                                        |
| H                                | -4.3574   | 0.605551  | 1.659088                                        |
| H                                | -4.26058  | 0.166898  | 3.163367                                        |
| O                                | -1.413114 | 1.564142  | 3.215673                                        |
| H                                | -1.204466 | 2.295095  | 2.593736                                        |
| H                                | -2.24992  | 1.176383  | 2.870136                                        |
| O                                | 0.762759  | 0.434567  | 0.28494                                         |
| H                                | 0.502989  | -0.03092  | 1.141647                                        |
| H                                | 1.476386  | -0.12015  | -0.153213                                       |
| O                                | -4.290354 | 1.566827  | -1.830438                                       |
| H                                | -3.916781 | 0.722102  | -2.237054                                       |
| H                                | -4.949885 | 1.881454  | -2.468884                                       |
| O                                | 4.495152  | 0.649022  | 2.703842                                        |
| H                                | 4.538089  | 0.820868  | 3.657848                                        |
| H                                | 3.808097  | 1.290467  | 2.375251                                        |
| Zn                               | -0.834943 | 0.992519  | -0.856047                                       |
| <hr/>                            |           |           |                                                 |
| Zn <sup>+</sup> H <sub>2</sub> O |           |           | Zn <sup>+</sup> (H <sub>2</sub> O) <sub>2</sub> |
| Zn                               | -0.000002 | -0.540696 | 0.000000                                        |
| O                                | -0.000002 | 1.509056  | 0.000000                                        |
| H                                | 0.000036  | 2.074215  | 0.780526                                        |
| H                                | 0.000036  | 2.074215  | -0.780526                                       |
| Zn                               | -0.003053 | -0.613768 | 0.000372                                        |
| O                                | 1.511937  | 0.866406  | -0.021917                                       |
| O                                | -1.506081 | 0.872616  | 0.021549                                        |
| H                                | 2.403274  | 0.66664   | -0.325357                                       |
| H                                | 1.587896  | 1.55195   | 0.649543                                        |
| H                                | -2.415638 | 0.672148  | 0.263969                                        |
| H                                | -1.530792 | 1.610128  | -0.596385                                       |
